# Supplementary material for: Methylphenidate regulation of osteoclasts in a dose- and sex-dependent manner adversely affects skeletal mechanical integrity
Source: PubMed Central journal article supplement (PMC5784171; doi:10.1038/s41598-018-19894-x), 2018-01-24
Supplement: 41598_2018_19894_MOESM1_ESM.pdf [file 41598_2018_19894_MOESM1_ESM.pdf]

**Methylphenidate regulation of osteoclasts in a dose- and sex-dependent manner adversely affects skeletal mechanical integrity**

Sardar MZ Uddin<sup>1</sup>, Lisa S Robison<sup>2</sup>, Dennis Fricke<sup>3</sup>, Evan Chernoff<sup>1</sup>, Michael Hadjiargyrou<sup>4</sup>, Panayotis Thanos<sup>3</sup>, David E Komatsu<sup>1\*</sup>

**Table S1 - MicroCT analysis of femoral trabecular and cortical bone**

|        | Femoral Trabecular MicroCT |                   |                                |                |                           |                  |                 | Femoral Cortical MicroCT     |                   |                            |                              |                              |                            |                              |                            |
|--------|----------------------------|-------------------|--------------------------------|----------------|---------------------------|------------------|-----------------|------------------------------|-------------------|----------------------------|------------------------------|------------------------------|----------------------------|------------------------------|----------------------------|
|        | Group                      | BV/TV (%)         | Conn-Dens. (mm <sup>-3</sup> ) | SMI            | Tb. N (mm <sup>-1</sup> ) | Tb. Th (mm)      | Tb. Sp (mm)     | BMD (mgHAcmm <sup>-3</sup> ) | BV/TV (%)         | Tb. Th (mm <sup>-1</sup> ) | BMD (mgHAcmm <sup>-3</sup> ) | Endo. Vol (mm <sup>3</sup> ) | Endo. S (mm <sup>2</sup> ) | Peri. Vol (mm <sup>3</sup> ) | Peri. S (mm <sup>2</sup> ) |
| Male   | Water                      | 0.1808±<br>0.0117 | 71.72±<br>4.77                 | 1.88±<br>0.086 | 2.77±<br>0.159            | 0.0893±<br>0.003 | 0.3988±<br>0.02 | 768.65±<br>5.11              | 0.99 ±<br>0.00007 | 0.78 ±<br>0.015            | 967.68 ±<br>4.51             | 8.28 ±<br>0.27               | 14.07 ±<br>0.23            | 21.98 ±<br>0.40              | 22.75 ±<br>0.24            |
|        | LD PF                      | 0.1863±<br>0.0175 | 60.60<br>4.20                  | 1.86±<br>0.164 | 2.65±<br>0.187            | 0.0961±<br>0.004 | 0.4228±<br>0.03 | 782.34±<br>4.71              | 0.99 ±<br>0.0011  | 0.78 ±<br>0.023            | 973.59 ±<br>4.99             | 7.97 ±<br>0.37               | 13.76 ±<br>0.31            | 21.29 ±<br>0.41              | 22.32 ±<br>0.23            |
|        | HD PF                      | 0.2068±<br>0.0218 | 75.23<br>6.48                  | 1.67±<br>0.176 | 3.03±<br>0.265            | 0.0902±<br>0.003 | 0.3835±<br>0.04 | 773.75±<br>2.77              | 0.99 ±<br>0.0009  | 0.77 ±<br>0.018            | 976.02 ±<br>4.75             | 8.06 ±<br>0.36               | 13.78 ±<br>0.31            | 21.40 ±<br>0.62              | 22.40 ±<br>0.32            |
|        | LD MP                      | 0.1660±<br>0.0151 | 66.44<br>3.74                  | 1.89±<br>0.085 | 2.44±<br>0.197            | 0.0892±<br>0.005 | 0.4823±<br>0.05 | 773.54±<br>5.45              | 0.99 ±<br>0.0007  | 0.81 ±<br>0.025            | 967.18 ±<br>4.73             | 7.19 ±<br>0.39               | 13.11 ±<br>0.38            | 20.51 ±<br>0.52              | 22.23 ±<br>0.33            |
|        | HD MP                      | 0.1518±<br>0.0071 | 69.06<br>3.42                  | 2.17±<br>0.075 | 2.58±<br>0.091            | 0.0841±<br>0.003 | 0.4150±<br>0.02 | 765.58±<br>2.63              | 0.99 ±<br>0.0016  | 0.76 ±<br>0.018            | 963.68 ±<br>4.88             | 7.97 ±<br>0.31               | 13.77 ±<br>0.2819          | 21.09 ±<br>0.47              | 22.29 ±<br>0.2536          |
| Female | Water                      | 0.2386±<br>0.02   | 78.25<br>7.71                  | 1.50±<br>0.152 | 3.41±<br>0.340            | 0.0921±<br>0.004 | 0.3571±<br>0.04 | 783.68±<br>5.04              | 0.99 ±<br>0.0022  | 0.63 ±<br>0.016            | 1008.12±<br>5.60             | 5.28 ±<br>0.13               | 11.30 ±<br>0.1511          | 14.65 ±<br>0.32              | 18.62 ±<br>0.22            |
|        | LD PF                      | 0.2951±<br>0.023  | 89.98<br>7.34                  | 1.19±<br>0.188 | 4.17±<br>0.346            | 0.1005±<br>0.002 | 0.2781±<br>0.03 | 787.63±<br>3.82              | 0.99 ±<br>0.0010  | 0.66 ±<br>0.010            | 1008.05 ±<br>4.10            | 5.48 ±<br>0.23               | 11.44 ±<br>0.25            | 15.35 ±<br>0.48              | 18.98 ±<br>0.30            |
|        | HD PF                      | 0.2599±<br>0.03   | 94.70<br>6.67                  | 1.40±<br>0.248 | 3.99±<br>0.265            | 0.0923±<br>0.005 | 0.2788±<br>0.02 | 769.39±<br>2.79              | 0.99 ±<br>0.0018  | 0.64 ±<br>0.011            | 1009.94±<br>3.96             | 5.78 ±<br>0.14               | 11.82 ±<br>0.17            | 15.50 ±<br>0.34              | 19.12 ±<br>0.29            |
|        | LD MP                      | 0.2749±<br>0.02   | 90.32<br>7.37                  | 1.37±<br>0.200 | 3.99±<br>0.268            | 0.0975±<br>0.004 | 0.2825±<br>0.02 | 779.76±<br>4.33              | 0.99 ±<br>0.0003  | 0.66 ±<br>0.011            | 1007.8 ±<br>4.96             | 5.77 ±<br>0.20               | 11.76 ±<br>0.21            | 15.73 ±<br>0.36              | 19.29 ±<br>0.23            |
|        | HD MP                      | 0.2302±<br>0.02   | 89.45<br>6.91                  | 1.58±<br>0.158 | 3.67±<br>0.282            | 0.0855±<br>0.003 | 0.3107±<br>0.03 | 767.44±<br>3.08              | 0.99 ±<br>0.0006  | 0.62 ±<br>0.009            | 1007.84 ±<br>6.36            | 5.54 ±<br>0.29               | 11.43 ±<br>0.32            | 14.77 ±<br>0.52              | 18.59 ±<br>0.35            |

**Table S1 - MicroCT analysis of femoral trabecular and cortical bone:** Trabecular and cortical bone were analyzed using microCT at the femoral metaphysis and mid-diaphysis respectively. MicroCT data did not show any significant differences in trabecular and cortical bone parameters, with the exception of a significant decrease in trabecular bone mineral density in HD MP female rats relative to Water rats.

**Table S2 - MicroCT analysis of L5 vertebra:**

|        |       | Vertebral Trabecular bone |                                |               |                           |               |               |                             | Vertebral Cortical Bone |                              |                             |                            |                            |
|--------|-------|---------------------------|--------------------------------|---------------|---------------------------|---------------|---------------|-----------------------------|-------------------------|------------------------------|-----------------------------|----------------------------|----------------------------|
| Sex    | Group | BV/TV (%)                 | Conn-Dens. (mm <sup>-3</sup> ) | SMI           | Tb. N (mm <sup>-1</sup> ) | Tb. Th (mm)   | Tb. Sp (mm)   | BMD (mgHAcm <sup>-3</sup> ) | BV/TV (%)               | Cort. Th (mm <sup>-1</sup> ) | BMD (mgHAcm <sup>-3</sup> ) | Peri. V (mm <sup>3</sup> ) | Peri. S (mm <sup>2</sup> ) |
|        | Male  | Water                     | 0.192 ± 0.01                   | 44.592 ± 3.45 | 1.547 ± 0.11              | 3.123 ± 0.12  | 0.086 ± 0.003 | 0.350 ± 0.013               | 710.96 ± 3.84           | 0.655 ± 0.03                 | 0.136 ± 0.007               | 846.468 ± 5.44             | 0.758 ± 0.043              |
| LD PF  |       | 0.212 ± 0.01              | 48.723 ± 5.78                  | 1.450 ± 0.11  | 3.345 ± 0.16              | 0.092 ± 0.004 | 0.330 ± 0.013 | 718.68 ± 5.02               | 0.657 ± 0.03            | 0.138 ± 0.006                | 847.228 ± 4.31              | 0.724 ± 0.036              | 11.710 ± 0.35              |
| HD PF  |       | 0.212 ± 0.02              | 50.770 ± 3.81                  | 1.318 ± 0.20  | 3.066 ± 0.16              | 0.088 ± 0.004 | 0.361 ± 0.017 | 724.92 ± 5.89               | 0.658 ± 0.01            | 0.139 ± 0.004                | 852.605 ± 6.27              | 0.710 ± 0.018              | 11.530 ± 0.20              |
| LD MP  |       | 0.225 ± 0.01              | 64.420 ± 5.77                  | 1.397 ± 0.08  | 3.686 ± 0.21              | 0.086 ± 0.002 | 0.301 ± 0.018 | 715.97 ± 3.17               | 0.673 ± 0.01            | 0.143 ± 0.004                | 853.127 ± 3.12              | 0.740 ± 0.028              | 11.770 ± 0.28              |
| HD MP  |       | 0.172 ± 0.01              | 51.326 ± 5.54                  | 1.708 ± 0.06  | 2.755 ± 0.14              | 0.084 ± 0.001 | 0.403 ± 0.021 | 715.69 ± 3.84               | 0.669 ± 0.01            | 0.138 ± 0.003                | 845.664 ± 3.23              | 0.737 ± 0.029              | 11.979 ± 0.32              |
| Female | Water | 0.275 ± 0.01              | 57.729 ± 7.21                  | 0.793 ± 0.12  | 3.557 ± 0.14              | 0.097 ± 0.002 | 0.311 ± 0.014 | 730.71 ± 3.22               | 0.703 ± 0.01            | 0.148 ± 0.004                | 877.885 ± 6.35              | 0.637 ± 0.021              | 10.022 ± 0.23              |
|        | LD PF | 0.263 ± 0.02              | 72.881 ± 12.06                 | 0.745 ± 0.26  | 3.543 ± 0.28              | 0.092 ± 0.003 | 0.328 ± 0.023 | 715.75 ± 6.42               | 0.679 ± 0.01            | 0.145 ± 0.003                | 863.917 ± 6.66              | 0.614 ± 0.013              | 9.807 ± 0.15               |
|        | HD PF | 0.301 ± 0.01              | 64.314 ± 6.26                  | 0.454 ± 0.10  | 3.651 ± 0.15              | 0.099 ± 0.002 | 0.310 ± 0.01  | 732.39 ± 3.24               | 0.678 ± 0.01            | 0.140 ± 0.004                | 869.212 ± 3.85              | 0.618 ± 0.020              | 9.907 ± 0.21               |
|        | LD MP | 0.277 ± 0.02              | 62.809 ± 7.76                  | 0.632 ± 0.19  | 3.431 ± 0.15              | 0.094 ± 0.003 | 0.327 ± 0.014 | 715.87 ± 6.25               | 0.702 ± 0.01            | 0.150 ± 0.004                | 875.367 ± 8.52              | 0.657 ± 0.023              | 10.239 ± 0.24              |
|        | HD MP | 0.260 ± 0.01              | 52.318 ± 4.22                  | 0.727 ± 0.09  | 3.282 ± 0.16              | 0.092 ± 0.001 | 0.337 ± 0.016 | 718.08 ± 3.45               | 0.671 ± 0.01            | 0.140 ± 0.003                | 856.564 ± 4.77              | 0.618 ± 0.018              | 9.917 ± 0.18               |

**Table S2 - MicroCT analysis of L5 vertebra:** Trabecular and cortical bone quantity in L5 vertebra were assessed using MicroCT. No significant changes were observed in male and female rats relative to MP treatments.
